# 1 Exploring Barriers to Parent-Adolescent Sexual-Risk Communication among Adolescents 2 in Port Harcourt Nigeria: Adolescents' and Parents' Perspective

3 Okpalaku Joycelyn Chidinma<sup>1</sup> Chigozirim Ogubuike<sup>2</sup>

4 <sup>1</sup>School of Public Health, University of Port-Harcourt Nigeria

5 <sup>2</sup>Department of Community Medicine, University of Port-Harcourt Teaching Hospital, Rivers  
6 State Nigeria

7 Correspondence: [chidinma.okpalaku@gmail.com](mailto:chidinma.okpalaku@gmail.com)

## 8 ABSTRACT

9 **Background:** Adolescent risky sexual behaviour is a public health problem with its deleterious  
10 outcomes. Parents are the most influential source of sexuality education to adolescent, yet  
11 adolescents lack sexuality education. The study explored barriers in parent-adolescent sexual-  
12 risk communication from both perspectives in Port-Harcourt LGA, Rivers State, Nigeria.

13 **Materials and Method:** A cross-sectional study design using explanatory sequential mixed  
14 methods approach was implemented. Three hundred and twenty nine in-school adolescents  
15 participated in the quantitative study and recruited using multi-stage sampling technique while 9  
16 parents of adolescents and 16 adolescents participated in the qualitative study. A semi-structured  
17 administered questionnaire was used to elicit information from the adolescents while an FGD  
18 and IDI guide was used to elicit information from in-school adolescents and parents respectively.  
19 The qualitative data was analysed using descriptive statistics and chi-square while the qualitative  
20 data was subjected to thematic analysis.

21 **Results:** The mean age of the adolescents was 16.0±1.1 years and 55% were males. A quarter  
22 (21%) of the parents had never discussed sex with their adolescents. The barriers identified from  
23 the adolescents' perspective were parental factors (parents being too busy, judgmental, low

24 knowledge), individual factors (discomfort to initiate communication, lack of trust), religious and  
25 cultural factors. The barriers from the parents' perspective were shame to initiate  
26 communication, fear of outcome, feeling children are too young and lack of accurate  
27 information.

28 **Conclusion:** The barriers to parent-adolescent communication featured interplay of parental,  
29 individual, cultural and religious factors. Parents should be trained to initiate timely and accurate  
30 sexuality education to the adolescent to curb adolescent risky sexual exploitations.

31 **Key words:** Sexual-risk communication, Barriers, Adolescent, Risky sexual behaviour

32 **Word Count:** 247

33

34

## 35 **BACKGROUND**

36 Adolescence, which occurs between the ages of 10 and 19 years, is a stage between childhood  
37 and adulthood marked by profound psychosocial, psychological, and social changes.<sup>1, 2</sup>

38 Adolescents constitute of 1.8 billion or one-fourth of the world's population, therefore the care  
39 for this group is accompanied with socioeconomic progress and societal advancement that are  
40 being confronted.<sup>3</sup> They go through anatomical and psychological changes that have a profound

41 impact on their mental wellness, which is manifested as high levels of sexual curiosity.<sup>4</sup> This  
42 sexual desire could result in risk-taking sexual behaviour if there is no behaviour counselling

43 during the adolescent years.<sup>5</sup> Risky sexual behaviours are behaviours that put a person at risk for  
44 STIs like HIV and unintended pregnancies. These actions include having several sexual partners,

45 transactional sex, forced or coerced sex, and unprotected sexual contact.<sup>6</sup> Adolescents who are  
46 sexually active are more likely to participate in risky behaviours that could raise the likelihood of

47 early sexual activity, increase the chance of unintended pregnancy and abortion, and increase the  
48 risk of sexually transmitted diseases.<sup>7</sup> Additionally, they are vulnerable to several issues and  
49 attitudes related to sexual and reproductive health.<sup>8</sup>

50 Research has shown that open conversation between parents and children about sex can  
51 significantly lower the sexual risk that adolescents face.<sup>9, 10</sup> Adequate sexuality communication  
52 between young people and their parents or other caregivers has been found to be one of the  
53 elements that protects against non-risky sexual behaviours, such as a delayed sexual debut,  
54 especially in females.<sup>11</sup> Open communication between parents and adolescents has been proven  
55 essential for lowering the morbidity and mortality associated with risky sexual behaviours.<sup>12</sup>  
56 Also, parent-child discussion on sexual and reproductive topics, have shown to increase  
57 awareness and reduce risk-taking behaviour.<sup>13</sup> According to the Advocates for Youth, parent-  
58 adolescent sexual-risk communication about contraception, the menstrual cycle, premarital sex,  
59 unintended pregnancies, and ways to prevent STDs helps solve problems associated to sexual  
60 and reproductive health.<sup>14</sup> Nevertheless, it is reported that the majority of the knowledge that  
61 adolescents have about sex or sex education comes from their female classmates and  
62 schoolmates, who rarely provide accurate or precise information.<sup>15</sup> Research has shown that the  
63 sexual behaviour of adolescents is always a sensitive issue in churches, schools, and families  
64 with each of them pointing fingers at the other when problems that relate with adolescent  
65 sexual behaviour crop up.<sup>16</sup>

66 Most parents find it difficult to discuss sexual and reproductive health issues with their children  
67 and instead choose to steer the conversation toward "safe" topics or provide cautionary  
68 statements whenever there is a sexually related issue.<sup>17</sup> Parents and adolescents' communication  
69 or lack of it has always arisen to serious social and health consequences which include parent

70 child conflict, school dropouts, unwanted pregnancy, unsafe abortion, STIs such as HIV and  
71 AIDS. Most parents experience discomfort when speaking about adolescent reproductive health  
72 with their adolescents and this can hinder the occurrence of effective reproductive health  
73 communication.<sup>11</sup> Parent's generally have a negative aversion to communication on sex  
74 education and this aversion to the teaching of sexual health by parents is due to a strong  
75 proclivity to culture and religious teachings imbibed from their fore parents.<sup>18</sup> Parental and  
76 societal distaste to sex education hasn't changed over time which has resulted into an  
77 overlooking of adolescents as they receive virtually no or relatively little reproductive health care  
78 and education.<sup>19</sup> This study explored parent-adolescent sexual risk communication from both the  
79 adolescent and adolescent perspective to unravel the barriers; this would help in policy and  
80 programmatic directions curb risky sexual exploitations in adolescents.

81 This study focused on parent-adolescent communication on sexual risk practices because it is the  
82 researcher's conviction that adolescents are greatly influenced by their parents or caregivers  
83 which are the most important source on sex education and prevails over other factors that pertain  
84 to adolescents. Therefore, this study was conducted to determine the proportion of adolescents  
85 that received sexuality education from their parents, explore barriers to parent-sexual risk  
86 communication and recommendations for easier sexuality communications by parents.

87

## 88 **MATERIALS AND METHOD**

### 89 **Study Area**

90 Port-Harcourt city is the capital of Rivers State in Nigeria otherwise known as Port Harcourt  
91 Local Government Area (PHALGA). It is one of the 23 local government areas created for the  
92 state. It is located in the southern part of the country and is one of the states in the Niger Delta

93 region. The Local Government Area is bounded by Ikwerre and Etche Local Government Areas  
94 at the North, Asari-Toru and Okrika Local Government areas at the South, Emohua LGA at the  
95 West and Eleme and Oyigbo LGAs at the East in Rivers State. <sup>20</sup> In 2021, the population of Port  
96 Harcourt was estimated to be 3,171,076. <sup>21</sup> Port Harcourt is the nerve centre of the Nigerian Oil  
97 industry and includes other industries too. It is also the nation's second largest sea port with the  
98 Onne Port Complex in close proximity. Marine agriculture is the main occupation of the people  
99 of Rivers state with farming and trading being the two major occupations of Port Harcourt  
100 residents. The state has a 154 non-tertiary public, private and government schools which means a  
101 whole lot of adolescents enrolled into these schools which covers the study population for this  
102 study.

103

#### 104 **Study Design and Population**

105 A cross-sectional study design using the explanatory sequential mixed method approach was  
106 utilized for this research. It is a two-phase mixed methods design that starts with the collection  
107 and analysis of quantitative data followed by the subsequent collection and analysis of  
108 qualitative data. The study population involved in-school adolescents and parents of adolescents.  
109 This study included in-school male and female adolescents between the ages of 15-19 years from  
110 junior secondary school (JSS3) and senior secondary school (SS1, SS2 and SS3) in selected  
111 public and private schools in Port Harcourt LGA. Parents recruited were those that have  
112 adolescents. The adolescents were involved in both quantitative and qualitative data collection  
113 while the parents were involved in only qualitative data collection.

114

115

## 116 **Sample size determination**

117 The sample size for the quantitative aspect was determined using Cochran's formula:

$$118 \quad n = \frac{z^2 p q}{d^2}$$

119 Where, n =the desired sample size.

121 z = the standard normal deviate, usually set at 1.96 which corresponds to 95% confidence level.

122 p = the proportion of adolescents who communicated with their parents on SRH issues was 36.9  
123 or 37% (Shiferaw et al.)<sup>15</sup>

$$124 \quad q = 1 - p = 1 - 0.37 = 0.63$$

125 d = degree of accuracy desired, usually set at 0.05.

$$126 \quad n = 1.96^2 \times 0.37 (1-0.37)/0.05^2$$

127 = 358.1. Assuming a non- respondent rate of 10%, the minimum sample size was estimated at  
128 394.

129 For the qualitative aspect, 9 parents of adolescents and 16 adolescents were purposively  
130 recruited to participate in the study.

131

## 132 **Sampling method**

133 For the quantitative aspect a multistage sampling method was used in this study. The first stage  
134 involved random selection of schools. The list of schools in Port Harcourt LGA was obtained  
135 from the Rivers State Ministry of Education and used as the sampling frame. The schools were  
136 first stratified into private and public schools and simple balloting was used to select two private  
137 and two public schools. The second stage is the selection of students according to classes and  
138 gender. The students were stratified into 3 groups based on their classes i.e. SSS1, SSS2, and

139 SSS3 and then re-stratified based on their sexes (Males and Females). The third stage involved  
140 the proportionate allocation. The sub-sample for each stratum was divided proportionately into  
141 the number of arms/forms in each class. The sample size was proportionately divided into each  
142 of the strata based on their population. About 100 students were recruited from each school,  
143 hence a total of 400 participants were recruited.

144 In the qualitative aspect the respondents were recruited purposively, the adolescents participated  
145 in a focus group discussion (FGD) while the parents participated in an in-depth interview (IDI).

146

### 147 **Data Collection**

148 Recruitment for participants for the pilot study commenced on the 5<sup>th</sup>- 7<sup>th</sup> May 2021 while  
149 recruitment of participants for the study was between 6<sup>th</sup>- 24<sup>th</sup> July 2021. Parents were  
150 recruited 6<sup>th</sup> -11<sup>th</sup> August 2021.

151 Structured interviewer administered questionnaires were given to the adolescents which they  
152 completed themselves. Data was gotten from the parents via in-depth interview and was audio  
153 recorded. The consent of the participants was sought before the research questionnaire was  
154 given. Participants were asked to sign on a well-written consent form enclosed on the  
155 questionnaire after the study had been explained to them so as to show their voluntary  
156 participation. For adolescents below 18 years, it was ensured that their guardians in form of the  
157 school principals were present, signed the consent forms and the adolescents also assented before  
158 questionnaires were administered. The questionnaires were collected after being completed and  
159 the participants were appreciated for their contribution and time.

160

161

162

163 **Study instrument and Data analysis**

164 A pre-tested structured interviewer-assisted questionnaire was used to elicit information on the  
165 socio-demographic characteristics of the respondents, source of information and proportion of  
166 adolescents that received sex education. The researcher administered the questions to the  
167 adolescents and retrieved them after completion. An in-depth interview guide and focus group  
168 discussion guide was used to elicit qualitative information on the barriers and facilitators to  
169 parent-adolescent sexual-risk communication. The questionnaire was adapted from earlier  
170 studies on parent-adolescent communication about sexuality,<sup>17, 22, 23, 24</sup> while some other  
171 questions were introduced by the researcher and given to two experts to check for face validity.  
172 SPSS statistical software version 25 was used for the qualitative analysis. Mean and standard  
173 deviation were used for descriptive statistics. Atlast ti software was used for the analysis of the  
174 qualitative data. The interviews were audio recorded, transcribed verbatim, carefully read and  
175 edited by the researchers to ensure original meanings were not lost to translation. The qualitative  
176 data was subjected to thematic analysis.

177

178 **Ethical considerations**

179 Ethical clearance was obtained from the Research and Ethics Committee of the University of  
180 Port Harcourt and permission obtained from the school authority of chosen schools before  
181 commencement of the study. A written consent was also obtained from the parents/guardians  
182 before starting the study. Assent was gotten for the students below 18 years of age in addition to  
183 the written consent signed by their guardians (School Principal) while adolescents 18 years and  
184 above completed the consent forms themselves. Information of the study was made available on



185 each consent form. Confidentiality was guaranteed as personal details of respondents were not  
186 included in the data collection instrument. Serial numbers were used and as a result, collected  
187 data wasn't linked to any of the respondents.

188

## 189 **RESULTS**

### 190 **Socio-demographic characteristics**

#### 191 **Socio-demographic characteristics of the adolescents**

192 The socio-demographics of adolescents recruited into the study is shown in Table 1. A total of  
193 329 out of 400 students completed the questionnaire giving a response rate of 83.5%. The result  
194 revealed that 236 (71.7%) of the adolescents were between the ages of 15-16 years with a mean  
195 age of  $16.0 \pm 1.1$  years, 190 (57.8%) were males, 165 (50.2%) were in SS2 and 316 (96.0%) of the  
196 respondents were Christians. Most of the adolescents 223(67.8%) belonged to a monogamous  
197 family and 202(61.4%) lived with their biological parents. About 196(59.6%) of the adolescents  
198 had a family size of 4-6 persons, 129(39.2%) of the adolescents' fathers had only vocational  
199 training, 102(31.0%) of the adolescents mothers had no formal education, 145(44.1%) of the  
200 adolescents' fathers were self-employed and 204(62.0%) of the adolescents' mothers were self-  
201 employed. For the qualitative data, 16 adolescents participated in an FGD of two groups (8 males  
202 and 8 females).

203

#### 204 **Socio-demographic characteristics of parents**

205 Nine parents of adolescents participated in an IDI session comprising of 5 males and 4 females  
206 among which 3 were teachers, 3 traders and 3 civil servants. Six of them had attained a tertiary  
207 education and three had attained a secondary education.

208

209 **Table 1a: Socio-Demographic Characteristics of Adolescents in Port Harcourt, Rivers State**

| <b>Variable</b>    | <b>Frequency n=329</b> | <b>Percentage</b> |
|--------------------|------------------------|-------------------|
| <b>Age group</b>   |                        |                   |
| 15-16 years        | 236                    | 71.7              |
| 17-19 years        | 93                     | 28.3              |
| <i>Mean age</i>    | <i>16.0±1.1</i>        |                   |
| <b>Sex</b>         |                        |                   |
| Male               | 190                    | 57.8              |
| Female             | 139                    | 42.2              |
| <b>Class</b>       |                        |                   |
| SS1                | 136                    | 41.3              |
| SS2                | 165                    | 50.2              |
| SS3                | 28                     | 8.5               |
| <b>Religion</b>    |                        |                   |
| Christianity       | 316                    | 96.0              |
| Islam              | 10                     | 3.0               |
| Traditionalist     | 3                      | 0.9               |
| <b>Family type</b> |                        |                   |
| Monogamy           | 223                    | 67.8              |
| Polygamy           | 38                     | 11.6              |

|                                    |     |      |
|------------------------------------|-----|------|
| Single parent                      | 55  | 16.7 |
| Step parent                        | 13  | 4.0  |
| <b>Family structure</b>            |     |      |
| Two Biological parents             | 202 | 61.4 |
| Biological father only             | 15  | 4.6  |
| Biological Mother only             | 34  | 10.3 |
| Biological father and step mother  | 9   | 2.7  |
| Biological mother and step father  | 5   | 1.5  |
| With guardian                      | 52  | 15.8 |
| Other family member (grandparents) | 12  | 3.6  |

210

211

212

213

214

215 **Table 1b: Social Demographic Characteristic of Adolescents in Port Harcourt, Rivers State**

| <b>Variable</b>    | <b>Frequency n=329</b> | <b>Percentage</b> |
|--------------------|------------------------|-------------------|
| <b>Family size</b> |                        |                   |
| Less than three    | 42                     | 12.8              |
| Four to Six        | 196                    | 59.6              |

|               |    |      |
|---------------|----|------|
| Seven to nine | 62 | 18.8 |
| 10 and above  | 29 | 8.8  |

**Father's education**

|                     |     |      |
|---------------------|-----|------|
| No formal education | 129 | 39.2 |
| Vocational training | 118 | 35.9 |
| Primary             | 29  | 8.8  |
| Secondary           | 37  | 11.2 |
| Tertiary            | 16  | 4.9  |

**Mother's education**

|                     |     |      |
|---------------------|-----|------|
| No formal education | 102 | 31.0 |
| Vocational training | 141 | 42.9 |
| Primary             | 27  | 8.2  |
| Secondary           | 41  | 12.5 |
| Tertiary            | 18  | 5.5  |

**Father's occupation**

|                            |     |      |
|----------------------------|-----|------|
| Employed by the government | 79  | 24.0 |
| Private employment         | 91  | 27.7 |
| Self-employment            | 145 | 44.1 |
| Unemployed                 | 14  | 4.3  |

**Mother's occupation**

|                            |     |      |
|----------------------------|-----|------|
| Employed by the government | 55  | 16.7 |
| Private employment         | 52  | 15.8 |
| Self-employment            | 204 | 62.0 |

Unemployed 18 5.5

---

216

217

218 **Proportion that received sexual education from parents**

219 Table 2 shows the proportion of adolescents that received sexual education from their parents.

220 It was shown that 69(21.0%) of the parents had never discussed sex education with their  
221 children, 107(32.5%) of adolescent reported that they would be more comfortable discussing  
222 sexual related issues with their mother. A majority of them 190(57.8%) received sexual  
223 education from school.

224

225

226

227

228

229

230 **Table 2: Proportion of Adolescents in Port Harcourt, Rivers State That Received Sexual**  
231 **Education from Parents/guardians**

232

---

| Variable                                                | Frequency n=329 | Percentage |
|---------------------------------------------------------|-----------------|------------|
| <b>How often parents/guardian discuss sex education</b> |                 |            |
| Never                                                   | 69              | 21.0       |

---

---

|                                                         |     |      |
|---------------------------------------------------------|-----|------|
| Rarely                                                  | 91  | 27.7 |
| Sometimes                                               | 123 | 37.4 |
| Often                                                   | 20  | 6.1  |
| Always                                                  | 26  | 7.9  |
| <b>Comfortable discussing sexual related issue with</b> |     |      |
| Father                                                  | 35  | 10.6 |
| Mother                                                  | 107 | 32.5 |
| Siblings                                                | 31  | 9.4  |
| Teachers                                                | 17  | 5.2  |
| Peers of the same sex                                   | 50  | 15.2 |
| Friends                                                 | 89  | 27.1 |
| <b>Source of sex education</b>                          |     |      |
| Home                                                    | 105 | 31.9 |
| School                                                  | 190 | 57.8 |
| Internet/social media                                   | 25  | 7.6  |
| Church                                                  | 9   | 2.7  |

---

233

234

235

236

237

238 **Perceived Barriers to Parent-adolescent Sexual-risk Communication: Adolescents'**  
239 **Perspective**

240 Adolescents outlined some of the perceived barriers to effective sexual-risk communication. The  
241 barriers were grouped into three broad factors; parental factors (parents being too busy, parents  
242 are too judgmental, parental poor/inaccurate knowledge on sex education, parental belief that  
243 discussion will initiate sex); individual factors (lack of trust, fear/discomfort with discussion) and  
244 religious/cultural factors.

245 **A. Parental factors**

246 **Parents too busy with work**

247 One of the barriers to effective sexual risk communication between parents and adolescents were  
248 parents being too busy with work and rarely had time to communicate with their wards.

249 A male adolescent had asserted that:

250 *My dad is hardly ever home and even when he is at home; he says he's too tired to have any*  
251 *conversations with me. He doesn't have out time. All of my sexual knowledge is either from*  
252 *school, my friends or from the internet.*

253 ***Male Adolescent (16-20 years)***

254 A female adolescent had this to say:

255 *My mom is always travelling for business so, discussing sex with her is almost impossible. I can't*  
256 *discuss with my dad because he is of the opposite sex. Most of the knowledge I have on sex is*  
257 *what I was taught in school by my teachers, some from my friends too.*

258 ***Female Adolescent (11-15 years)***

259 Due to parents being too busy at work, adolescents' rarely received sexual-risk communication  
260 from their parents. They mentioned receiving sexual education from the school, their teachers,  
261 peers and the internet.

### 262 **Parents are too judgmental**

263 All female adolescents agreed that their parents are too judgmental which is why they don't  
264 discuss sexual and reproductive health issues with them, also their male counterpart asserted  
265 same. One of the female adolescent reported that:

266 *I don't discuss sexual matters with my mom because she will just assume that I want to start*  
267 *having sex that I why I am asking so, I don't bother meeting her to start up such discussions. She*  
268 *judges a lot and condemns me.*

### 269 **Female Adolescent (16-20) years**

270 A male adolescent averred that he wouldn't discuss sex with his parents because:

271 *My first knowledge about SRH was from school. My parents are the kind of people that read*  
272 *meaning into everything; even mere questions. I asking questions about these issues will mean*  
273 *that I have already started having sex or I want to have sex. There was this time i asked my dad*  
274 *if condoms were 100% effective in preventing pregnancy....My dad called my mom immediately*  
275 *and they started asking me all sorts of really embarrassing questions. Since then, i never asked*  
276 *them such questions again.*

### 277 **Male Adolescent (16-20) years**

278 The adolescents reported that their parents were too judgemental, read meaning into little things  
279 and condemn them when they asked questions on sexual and reproductive health related matters.  
280 They resorted never to have such discussions again with their parents.



281 **Parental Poor/inaccurate knowledge on SRH issues**

282 Some of the adolescents admitted that their parents do not have adequate/relevant information on  
283 sexual and reproductive health. They asserted that the sexuality knowledge of their parents were  
284 archaic/out-dated. A male adolescent reported that:

285 *I don't discuss sexual issues with my parents especially my mom because they are both 'old*  
286 *school'. Whatever information they have will be archaic. It's either I discuss with peers/friends*  
287 *or use the internet*

288 **Male Adolescent (16-20 years)**

289 One of the female adolescents affirmed same:

290 *I don't think my parents are well equipped to give me adequate knowledge on SRH issues. They*  
291 *are archaic. They do not just have enough knowledge. At least I receive up-to-date information*  
292 *in school from my teachers, peers and sometimes from the internet.*

293 **Female Adolescent (11-15 years)**

294 Adolescents' reported that their parents were not well equipped to give updated information on  
295 sexual and reproductive health issues hence they shy away from such discussions with them.  
296 They also narrated meeting their peers and the internet for information.

297 **Parental Belief that discussion will initiate sexual intercourse**

298 Some of the adolescents reported that they have not received sex education from their parents  
299 because their parents believed it would expose them to sexual exploitation. One of the adolescent  
300 avowed:

301 *Whatever information I got first about sex was from the school. My parents have never discussed*  
302 *sexual issues with me because they probably feel that I would want to venture into sex.*

303 ***Male Adolescent (11-15 years)***

304 In affirmation, another male adolescent narrated that:

305 *The first time I asked my dad about sex, he was very angry and asked me if I had already started*  
306 *having sex or want to have sex. He also assumed that I had already started having sex when I*  
307 *first asked him about condoms. He almost beat me up because of that one simple question. I was*  
308 *only between 11-15 years old at the time and as a result I vowed never to discuss sexual issues*  
309 *with my dad and he doesn't discuss with me either. I learn from peers and the internet.*

310 ***Male Adolescent (16-20 years)***

311 Parental assumptions that sexual education leads to initiation to sexual intercourse was reported  
312 by the adolescents as barriers to sexual-risk communications.

313 **B. Individual factors**

314 **Lack of trust**

315 All female adolescents agreed that lack of trust between parents and the adolescents hindered  
316 effective sexual and reproductive health discussion. Some of their words are captured below:

317 A female respondent related that:

318 *I don't trust my mom and my mom just doesn't trust me to have these kinds of discussions with*  
319 *me. She feels having these discussions is a way of encouraging me to venture into sex which isn't*  
320 *true at all.*

321 ***Female Adolescent (16 -20 years)***

322

323 Another female adolescent affirmed that:

324 *My parents do not trust my friends because they feel they will influence me negatively and as a*  
325 *result they do not trust me either. I have been warned against having a boyfriend or having sex.*  
326 *If I dare broach the subject of sex to them, then I'm looking for trouble*

327 ***Female Adolescent (11-15 years)***

328 Lack of trust by their parents and lack of trust parents had on their friends was reported by the  
329 adolescents as hindrances to sexual risk communication by their parents.

330 **Feeling of discomfort with sexual discussion**

331 Some of the adolescents reported that they felt uncomfortable having sexual discussion with their  
332 parents. They also noted that their parents felt very uncomfortable too with such discussions. A  
333 female adolescent reported that:

334 *Whenever I ask my Mom about sexual issues, she gets so uncomfortable with the discussion that*  
335 *after a while I stopped discussing with her but I discuss with my friends in school.*

336 ***Female Adolescent (16-20 years)***

337 A male adolescent asserted same:

338 *My parents rarely discuss sexual issues with me because they are always so uncomfortable with*  
339 *the discussion which also makes me uncomfortable too. I think we all noticed this and stopped its*  
340 *discussion completely. They don't discuss sexual matters with me anymore.*

341 ***Male Adolescent (16-20 years)***

342 Sexual risk communication discomfort was reported by the adolescents as barriers to sexual  
343 education. As a result of this discomfort they sourced sexual and reproductive information from  
344 their friends.

345 **Fear to initiate sexual with discussion**

346 Some of the adolescents reported being too scared to initiate discussion with their parents.

347 A female adolescent averred that:

348 *I discuss more of SRH issues like physical development, menstruation with my mom because we*  
349 *are of the same gender. I dare not mention sex or any related topic to her because she will beat*  
350 *me. She will think that I have a boyfriend and want to experiment with him.*

351 **Female Adolescent (16-20 years)**

352 A male adolescent corroborates same:

353 *I would love to discuss sexual issues with my parents but I am too scared of what they will think*  
354 *or feel about me.*

355 **Male Adolescent (16-20 years)**

356 Some of adolescents reported being selective on sexual and reproductive health issues to discuss  
357 with their parents as a result of fear associated with sexual discussions.

358 **C. Religious/Cultural factors**

359 Some of the respondents revealed that their parents do not discuss sex with them because it is  
360 against their religion, cultural or traditional affiliations.

361 One of the female adolescent narrated that:

362 *....my parents are just too religious. Such discussion is a forbidden at home. If I even ask them by*  
363 *mistake, they will skin me alive because they will assume that I want to start experimenting. I'm*  
364 *not even allowed to have male friends around me.*

365 **Female Adolescent (16-20 years)**

366 A male adolescent affirmed that:

367 *My parents do not discuss sexual issues with me or my siblings because it is against our religion.*

368 *Our Church forbids such discussions in the home. Whatever I know about sexual issues, I got*  
369 *from my friends in school.*

370 ***Male Adolescent (16-20 years)***

371 Cultural factors were highlighted as a hindrance to sexuality education. A female adolescent  
372 avowed that:

373 *....whenever I ask my mom about issues relating to sex, she always tells me it is against our*  
374 *culture to discuss such issues with children.”*

375 ***Female Adolescent (11-15 years)***

376 Adolescents reported that their parent considers sexual education as a taboo as a result of their  
377 religious and cultural affiliations.

378 **Perceived Barriers to Parent-adolescent Sexual-risk Communication - Parents' Perspective**

379 When it comes to the necessity of discussing sexual and reproductive health issues with  
380 adolescents, parents had a whole lot to say on this. Some of the parents were in the opinion that  
381 children may make mistakes if sexuality education isn't discussed with them and were in  
382 agreement that these discussions are needed while a few felt that sexual education isn't  
383 necessary. They perceived that these discussion will give children ideas on sex as children listen  
384 more to their parents than they do other persons, they also perceived that discussion will initiate  
385 sexual experimentation/early sexual debut.

386 In agreement on the important of sexuality education to adolescents, one of the parents reported  
387 that: *...discussion with children is very necessary because parents underplay the influence they*  
388 *have on their children's decisions.*

389 ***Female Parent of Adolescent, Teacher***

390 In corroboration, another parent narrated negative consequences of non-sexuality  
391 communication:

392 *I think parents should discuss with their children. My neighbour's daughter got pregnant as a*  
393 *teenager and that brought shame to the family. She had to quit going to school at a point as a*  
394 *result of this. Maybe, if her parents had discussed these things with her, she won't have made*  
395 *such a mistake. As a result of this, I had to start discussing sex with my children. Children should*  
396 *be armed with the knowledge to make wise decisions regarding their sexual life*

397 ***Male Parent of Adolescent, Civil Servant***

398 In disagreement, one of the parents opined that:

399 *No, discussion on sex with my children will give them ideas to experiment. I don't discuss it with*  
400 *my children.*

401 ***Male Parent of Adolescent, Trader***

402 A female parent averred that:

403 *No, I don't discuss with my children though because I am not comfortable having such*  
404 *discussion with them*

405 ***Female Parent of Adolescent, Petty Trader***

406

407 Parents narrated their perceived barriers to sexuality communication with the adolescents. These  
408 barriers were grouped into three factors namely; Individual factors (shame initiating sexuality  
409 discussion and gender barriers, barely enough time for discussion, level of education of parents),

410 adolescent factors (fear that children will want to experiment sexually, feeling that children are  
411 too young to be educated on SRH issues), and tradition/religious beliefs.

412 **A. Individual factors**

413 **Shame initiating sexuality discussion and gender barriers**

414 Parents revealed that they sometimes experience a feeling of shame while discussing SRH issues  
415 with their children. A female parent reported:

416 *I have never discussed things like puberty with its associated changes in males and females with*  
417 *my children because i feel so shamed discussing these issues with them it is an abomination in*  
418 *my culture too. My mom never discussed with me so, i never do with my children.”*

419 ***Female Parent of Adolescent, Petty Trader***

420 Gender barriers were one of the factors that hinder parents from effectively discussing sexual and  
421 reproductive health issues with their adolescents as revealed in the study. Parents fail to discuss  
422 with their children of the opposite sex on sexuality education such as condom use, puberty and  
423 physical development. A female parent averred that:

424 *I have 2 sons who I can't communicate on sex, condom use or things like 'wet dreams' because it*  
425 *is shameful for me. I leave this discussion for my husband to do.*

426 ***Female Parent of Adolescent, Teacher***

427 A male parent had this to say:

428 *.....I really feel is awkward discussing with my daughters especially on puberty and*  
429 *menstruation. It is the job of their mother and their teachers*

430 ***Male Parent of Adolescent, Civil Servant***

431 Shame initiating sexuality discussions and gender barriers were one of the factors that hinder  
432 parents from effectively discussing sexual and reproductive health issues with their adolescents.  
433



434 **Barely enough time for discussion**

435 Another barrier that was highlighted by parents was the issue of time. Some of the parents do not  
436 discuss with their children because they are just too busy with work and so the discussion is  
437 usually left to the other spouse.

438 A male parent gave this as a reason:

439 *.....my kind of job doesn't give me enough time to discuss with my children. I'm usually really*  
440 *tired when I get home and I work most weekends. I only make out time to discuss really*  
441 *important stuff with them.*

442 ***Male Parent of Adolescent, Civil servant***

443 Another corroborated same:

444 *I don't have that kind of time. My husband is late so, the whole responsibility of catering for the*  
445 *family falls on me. It's not easy to be the only parent so, I'm so busy. My child is also a male so;*  
446 *discussing SRH issues with him is not something I'm comfortable with.*

447 ***Female Parent of Adolescent, Cleaner***

448 Parents reported not having enough time for sexuality education and abandoning the sex  
449 education for their spouse who may barely have the time to initiate such discussions.

450 **Level of education of parents**

451 Another striking barrier is the level of education of parents. Parents who had a higher level of  
452 education or work in a corporate establishment discuss more about SRH especially sexual issues  
453 than others who had a lower level of education. A male parent with secondary school education  
454 reported that:

455 *I have never discussed sex education with my children because i feel they shouldn't know about*  
456 *these kinds of things. What they don't know will not 'spoil' them.*

457 ***Male Parent of Adolescent, Trader***

458 A female parent also with secondary education narrated the disadvantage of sex education:

459 *I have never discussed sex education with my son. I don't think it's important that he knows*  
460 *about sex. He may want to experiment if i start discussing with him.*

461 ***Female Parent of Adolescent, Cleaner***

462 Some of the parents who had secondary education never had discussion of SRH issues with their  
463 adolescents because of fear of negative impact from the discussion.

464 **B. Adolescent factors**

465 **Fear that children will want to experiment sexually**

466 Some of the parents expressed fear as the reason why they do not discuss SRH issues with their  
467 adolescents.. A parent reported that:

468 *Discussing issues like condom use, sex, STIs/STDs will make my sons feel that they can venture*  
469 *into sex even before they come of age. This is why I don't discuss these with them.*

470 ***Female Parent of Adolescent, Teacher***

471 Another parent had this to say:

472 *Discussing things like pregnancy and prevention, relationships etc. will make my daughter feel*  
473 *that it's okay to have sex in her relationships with the opposite sex probably. Children of this age*  
474 *just want to experiment and besides, she is also too young to understand.*

475 ***Female Parent of Adolescent, Trader***

476 Parents feared that discussion about pregnancy, how to practice safe sex, condom use and  
477 sexually transmitted infections will push or encourage their children into engaging in sexual  
478 activities

#### 479 **Feeling that children are too young to be educated on SRH issues**

480 Most parents do not discuss SRH issues with their children because they feel that their children  
481 are too young to be taught SRH issues like sex, pregnancy, condom use, STIs/STDs.

482 A female parent expresses:

483 *My daughter is too young for this sort of discussion and I don't really feel comfortable*  
484 *discussing these kinds of things with her. How can I start educating my less than 15 year old*  
485 *daughter about pregnancy, sex or even STIs? I can't discuss these with her at such a young age.*

486 ***Female Parent of Adolescent, Petty Trader***

487 Another female parent had this to say: *I have never discussed sex with my children because they*  
488 *shouldn't know about sex at their age. They are too young for that*

489 ***Female Parent of Adolescent, Trader***

490 Adolescents especially at their early adolescence were perceived to be too young to receive  
491 sexual education by their parents.

#### 492 **C. Tradition/Religion**

493 Tradition and religion were also seen as barriers to effective parent-adolescent sexual risk  
494 communication. A male parent inferred that:

495 *For me it's against my tradition to discuss these things with my children especially my son who*  
496 *is too young. He's less than 15 years. I feel he should know stuff like these when he's officially*  
497 *an adult. Male Parent of Adolescent, Trader*

498 Another parent extrapolated that:

499 *I have never discussed sexual issues with my children because the church frowns at it. I only*  
500 *discuss things like menstruation with my daughter because she needs to know about it and*  
501 *physical development for all my children because they all need to know.*

502 ***Female Parent of Adolescent, Petty Trader***

503 Some of the respondents reported that they do not discuss sexual issues with their children  
504 because tradition and region doesn't allow it. For some of the female parents they only discussed  
505 menstruation and physical development with their daughters.

## 506 **Facilitators of sexual and reproductive health discussion with adolescents**

507 Parents were asked what would make it easier for them to discuss SRH issues with their  
508 adolescents. The facilitators as listed by the parents were grouped into three; adolescent factors  
509 (attaining maturity, closeness with adolescents, and initiation of discussion by adolescence),  
510 eliminating barriers (prior discussion by their own parents, permission by the traditional and  
511 religious organizations) and parents' inclusion in sex education (integration of parents on SRH  
512 discussions in school).

### 513 **A. Adolescent factors**

#### 514 **Maturity of the Adolescent and Closeness with children**

515 Some of the parents believed that attaining maturity by the adolescents would necessitate easier  
516 adolescent sexual and reproductive health discussions. A parent stated that:

517 *My children being old enough will make it easier to discuss with them. They are too young right*  
518 *now and may not understand the importance of discussion.*

519 ***Male Parent of Adolescent, Trader***

520 Another parent asserted: *Discussing sexual issues with my children will probably be easier if*  
521 *they initiated the conversation themselves.*

522 ***Male Parent of Adolescent, Teacher***

523 Another parent believed that parent-adolescent relationship and closeness would facilitate easier  
524 adolescent sexuality communication. A male parent agreed that:

525 *I'm not very close with my children so, they barely discuss this with me or i with them. Closeness*  
526 *with them would have made discussion really easy.*

527 ***Male Parent of Adolescent, Civil servant***

528 Adolescent attaining maturity, adolescents initiating sexuality conversation, closeness with  
529 adolescents were some of the adolescent facilitators to initiating sexual-risk communication.

530 **B. Eliminating sex education barriers**

531 **Receiving prior communication from parents**

532 A prior sexuality discussion with parents was suggested to facilitate easier sexual and  
533 reproductive health discussions with their children.

534 A female parent had this to say:

535 *If my own parents had discussed this with me as an adolescent, maybe discussing with my own*  
536 *children won't be so difficult or uncomfortable.*

537 ***Female Parent of Adolescent, Teacher***

538 Eliminating barriers in parental sexual-risk communication was reported to facilitate easier  
539 communication with adolescents.

540 **Permission by traditional and religious organizations**

541 Some of the parents reported that cultural and religious factors impeded free sexuality  
542 conservation with their wards.

543 A parent averred that: *If tradition and my church don't forbid it, I would probably discuss with*  
544 *my children on these matters but as it stands now, my hands are tied.*

545 ***Female Parent of Adolescent, Petty Trader***

546 Parents recommend that traditional and religious bodies should encourage sexuality  
547 communications to the adolescents.

548 **C. Parents inclusion in sex education**

549 **Integration of parents on SRH discussions in school**

550 Parents mentioned that being included in SRH programmes in their children's school would go a  
551 long way in reminding parents of the importance of discussing SRH issues with their children.

552 A male parent related that:

553 *I am a teacher and in the course of my work, I discovered that most parents do not discuss sexual*  
554 *matters with their children unless something bad happens. I think schools should include parents*  
555 *in sex education especially during PTA meetings. Parents can then be encouraged to discuss*  
556 *sexual matters with their children.*

557 ***Male Parent of Adolescent, Teacher***

558 A female parent affirmed that:

559 *Even though I don't discuss sexual matters with my children, i feel that if schools invite parents*  
560 *over and discuss this with them, they will be more open to also discuss with their children.*

561 ***Female Parent of Adolescent, Trader***

562 Parents reported that integrating sexual and reproductive health discussions in school using  
563 avenues like the Parents Teachers Association (PTA) would facilitate sexuality educations with  
564 adolescents at home.

565

566

## 567 **DISCUSSION**

568 Sex education plays a vital role in the sexual and reproductive health of adolescents; however,  
569 parents find it difficult to initiate sexual-risk communications. Adolescents' involvement in risky  
570 sexual behaviours places them at risk of serious unhealthy consequences not only for them but  
571 for their parents and the entire community at large. This study was conducted in Rivers State,  
572 Nigeria to determine the proportion of adolescents that received sex education from their parents,  
573 explore perceived parent-adolescent barriers to sexual-risk communication and factors that may  
574 facilitate parent-adolescent sexual-risk communication.

575 This study revealed that a quarter (21.0%) of the parents had never discussed sex education with  
576 their children; however, one-third (32.5%) of the adolescents reported being more comfortable  
577 discussing sexual-related issues with their mothers when communication occurs. A higher  
578 proportion was found in a study conducted in the USA from 2011–2015 where 57% of adolescent  
579 males and 43% of adolescent females did not receive information about sexual birth control or  
580 sex education before they first had sex.<sup>25</sup> A lower proportion was found in a survey done in  
581 southern Ethiopia, which revealed only a low proportion of adolescents communicated with their  
582 parents on SRH issues.<sup>12</sup> In corroboration, a study carried out in Nigeria revealed that the  
583 prevalence of communication between parents and children is low on SRH topics such as  
584 HIV/AIDS, family planning, and contraception, at 37.4%, 32.5%, and 9% respectively.<sup>26</sup>  
585 Similarly, another study conducted in Ebonyi State, Nigeria also revealed that the majority of  
586 adolescents never discussed anything related to sex with their parents or caregivers but discussed  
587 it with their friends or peers.<sup>27</sup> The similarities in these studies may be due to the barriers  
588 associated with parent-adolescent sexuality communications. This low parent-adolescent sexual



589 and reproductive health communication can make adolescents more prone to diverse negative  
590 sexual and reproductive health outcomes.

591 With the low parent-adolescent sexual and reproductive health communications observed in this  
592 study, the barriers were explored from both the adolescent and parent's perspective. Adolescents  
593 outlined some of the perceived barriers to effective sexual-risk communication grouped into  
594 three broad factors namely, parental factors (parents being too busy, parents being too  
595 judgmental, parental poor/inaccurate knowledge on sex education, parental belief that discussion  
596 will initiate sex); individual factors (lack of trust, fear/discomfort with discussion) and  
597 religious/cultural factors. Focusing on the adolescent perspectives, both the male and female  
598 adolescents jointly agreed from their different focus group discussions that their parents were too  
599 busy to initiate sexual and reproductive health communications with them. Parents left home  
600 most times early in the morning and returned home late at night tired. They barely had time to  
601 interact with the adolescents or even engaging in sexual-risk communications. This was in line  
602 with a qualitative review in East Africa that showed parents had no time to interact with the  
603 adolescents especially the publically employed with tight working schedules, unlike the self-  
604 employed parents who had more time to discuss with the adolescents.<sup>28</sup> In agreement, another  
605 study revealed that adolescents felt disconnected from their parents due to the fact that they are  
606 always busy with work or never home resulting in parent-adolescent sexuality barriers.<sup>29</sup> This  
607 reveals the need for work-life balance to enable parents to spend more time with their children  
608 and discuss sexual and reproductive health matters with them. The adolescents also indicated the  
609 information they obtained on sex education was gotten from the schools, their peers and from  
610 internet sources. This was similar with finding conducted by Krugu et al.<sup>30</sup> and Motsomi et al.<sup>29</sup>  
611 in Ghana and South Africa respectively.

612 The focus group discussions with the adolescent also revealed female adolescents do not discuss  
613 sexual matter with their parents because parents are too judgmental and would feel that they are  
614 already engaging in sex or want to initiate sexual intercourse through discussions on sexual  
615 matters. A study conducted in South Africa revealed same, it was reported that female  
616 adolescents found it difficult to face their parents after such a discussion and they thought their  
617 mothers would condemn them and assume they had started sleeping around with boys.<sup>29</sup> In the  
618 same vein, some of the male adolescents reported that they asked their fathers' about condom use  
619 and its effectiveness in prevention of pregnancy and they received a shocking feedback, they  
620 were either beaten or interrogated further in a condensing manner. With these judgmental  
621 attitudes by parents, most of the adolescents never initiated such conversations again; they relied  
622 on other sources of information. Health education may be useful in correcting this poor  
623 knowledge and judgmental attitude of parents.

624 Most of the adolescents believed that their parents had poor or inaccurate knowledge on sex  
625 education. They felt that their parents were either “old school” or have archaic knowledge on  
626 sexuality matters hence they relied on other updated sources especially the internet and social  
627 media platforms. In agreement, a study conducted in Ibadan reported that parents felt their  
628 children thought they were “old school” (traditional in views) and may judge them when they  
629 initiate a conversation around SRH issues.<sup>31</sup> This finding was in corroboration with a study  
630 carried out in Ebonyi State, Nigeria which revealed that parents reported that they do not know  
631 what to discuss when it comes to sex-related matters.<sup>32</sup> Similarly, another study revealed that  
632 parent was unsure of right answers to questions on sex which served as a barrier to sexuality  
633 communications.<sup>33</sup> The similarities in these studies reveal the need for enhanced training in sex  
634 education for parents and guardians.

635 Following the individual factors, adolescents reported they trusted their parents less with sexual-  
636 risk communications. Also, most of the female adolescents reported that their parents do not trust  
637 them because of the friends they keep. Their parents feared they were already sexually active or  
638 that such communication could lead to future experimentation by the adolescents. This was in  
639 line with a study that reported barriers to sexual communication; it was noted that sex education  
640 was perceived to lead to an early sexual debut and has no positive effect on adolescent  
641 behaviour.<sup>33</sup> A few reported that the only sexual and reproductive health communication they  
642 had with their parents was on physical development and menstrual hygiene. The adolescents  
643 further revealed that they were uncomfortable engaging in sexuality discussions with their  
644 parents, and some of the adolescents were too scared to initiate such discussions. Similar  
645 findings from a study revealed barriers to effective sexual risk communication, including  
646 discomfort with discussion and disinterest in adolescents.<sup>33</sup> Health education and enhancing  
647 parent-child relationships could limit these trust and misconception barriers.

648 The cultural and religious inclinations of their parents were reported by both genders as  
649 stumbling blocks to sex education. Adolescents reported that their parents vehemently refused to  
650 engage in sex education with them, even when they tried to initiate the conversation. Culturally,  
651 it was perceived as taboo to be discussed, and religiously, it was perceived to lead to sin. This  
652 finding was in agreement with a study conducted in Ghana, which revealed that the majority of  
653 rural adolescents do not communicate with their parents or caregivers with regard to sexual  
654 issues due to cultural and religious norms that prohibit adolescent-parent sexual communication.

655 <sup>34</sup>

656 Parents also expounded on some problems they encounter while discussing sexual and  
657 reproductive health matters with their adolescents. When parents were asked if they agreed to

658 initiate sexuality education for adolescents, varying opinions were received. Most of the parents  
659 who were traders were in disagreement while the teachers and civil servants were in agreement  
660 on discussing sexuality education with the adolescents. Similarly, a study revealed that parents  
661 who were civil servants were more likely to initiate sexuality communication than those in other  
662 groups.<sup>35</sup> This may be due the exposure that stems from working in an enlightened organization  
663 which could increases the knowledge of parents on the necessity of sexuality education. The  
664 parents who were in agreement to initiate sexual and reproductive health communications further  
665 expressed that a lack of sexuality communication could lead to more deleterious sexual and  
666 reproductive outcomes.

667 Parents narrated their perceived barriers to sexuality communication with the adolescents. These  
668 barriers were grouped into three factors, namely: individual factors (shame initiating sexuality  
669 discussion and gender barriers, barely enough time for discussion, level of education), adolescent  
670 factors (fear that children will want to experiment sexually, feeling that children are too young to  
671 be educated on SRH issues), and tradition/religious beliefs. Parents expressed being shy and  
672 having discomfort initiating sexuality and reproductive health discussions. A study conducted in  
673 South Africa revealed that most parents expressed discomfort and experienced embarrassment  
674 discussing sexual issues with their children, and they fear being misconstrued as wanting to  
675 engage in sexual activity with them.<sup>29</sup> However, one of the female parents revealed she never  
676 received such discussions from her mother and would never initiate such discussions due to  
677 shame and embarrassments that emanates from such conversations. In agreement, a study  
678 revealed parental barriers as parental discomfort discussing sex. Health education could be  
679 helpful to bridge these communication barriers.<sup>36</sup>

680 Gender barriers were outlined as one of the hindrances parents face to effective discussion on  
681 sexual and reproductive health issues with their adolescents. Parents find it difficult to discuss  
682 with their children of the opposite gender sexual and reproductive health topics such as condom  
683 use, puberty, and physical development. This poses a problem as parents of both sexes tend to  
684 communicate with children of the same gender; fathers would rather discuss with their sons,  
685 while mothers do the same for their daughters. In corroboration, a qualitative review conducted  
686 in East Africa reported gender barriers in that mothers and fathers of adolescents in this region  
687 discuss more with adolescents of the same sex because both parents feel shy and hence find it  
688 difficult to openly talk to their children.<sup>28</sup> This poses a need to address gender norms and  
689 stereotypes as it creates a stumbling block to parent-child sexual-risk communications.

690 Another barrier that was highlighted by parents was the issue of time. Some of the parents do not  
691 discuss this with their children because they are just too busy with work. In most cases, they  
692 assume the other partner would engage in such a discussion with the adolescent. Parents who had  
693 attained a higher level of education or worked in a corporate establishment discussed more  
694 sexual and reproductive health issues with their adolescents than others who had a lower level of  
695 education. This corroborates findings which revealed that parents with a tertiary level of  
696 education were more likely to initiate sexual and reproductive health communication than those  
697 with a primary level of education.<sup>34</sup> A qualitative review in East Africa showed that educated  
698 parents had the patience to talk verbally and face-to-face with their adolescents as compared to  
699 parents with less or without education.<sup>28</sup> More health education and enlightenment campaigns  
700 would be useful to break these barriers.

701 Most of the parents expressed fear in initiating sexuality education with the adolescents. They  
702 feared that discussions about pregnancy, how to practice safe sex, condom use, and so on would

703 push or encourage their children to engage in sexual activities. This was in line with a study that  
704 revealed that parents felt that engaging in discussions about sexuality and reproductive health  
705 issues would encourage their children to indulge in sex.<sup>29</sup> Most parents do not discuss sexual  
706 and reproductive health issues with their children because they feel that their children are too  
707 young to be taught about issues like sex, pregnancy, condom use, and STIs, they also believe  
708 they are too young to comprehend. They believed that the knowledge would come naturally to  
709 them as they grow into adulthood. This was similar to a finding from South Africa, which  
710 reported that most parents cited discussing issues pertaining to puberty, condom use, sexually  
711 transmitted infections, and contraceptives as inappropriate because their children are still too  
712 young.<sup>29</sup> Another study affirmed that a child being too young served as a hindrance to parent-  
713 adolescent sexuality communications.<sup>32</sup> Nevertheless, Nundwe<sup>22</sup> indicated that effective  
714 interaction on sexual and reproductive health is likely to reduce adolescent risk-taking sexual  
715 behaviours when parents talk with adolescents on sexuality issues.

716 Cultural and religious beliefs were also seen as inhibitors to effective parent-adolescent sexual  
717 risk communication. Some of the parents reported that they do not discuss sexual and  
718 reproductive health matters with their children because their traditional and religious belief  
719 frowns at such discussions. In the same vein, Malaclane and Beckmeyer<sup>35</sup> revealed parental  
720 barriers to include: racial/ethnic and religious factors. This was similar to studies conducted in  
721 South Africa and East Africa, which showed that traditional norms, culture and religious beliefs  
722 prohibited parents to speak on issues regarding sexuality to adolescents as it's seen as an  
723 abomination and a taboo hence they shy away.<sup>28, 29</sup> This may possibly indicate parents'  
724 incapability to disentangle from the traditional and religious norms around sexuality which is  
725 believed that such discussion could lead adolescents into sexual explorations. This further

726 emphasizes the need to change the culture of silence around sexuality and educate adolescents  
727 appropriately on sexual and reproductive health issues.

728 Facilitators for easier parent-adolescent sexual and reproductive health discussion were also  
729 explored. Parents suggested that prior discussion on sexuality communications by their own  
730 parents, permission by the church, removing traditional barriers, initiation of discussion by  
731 adolescence, adolescents attaining maturity, having a closer relationship with the adolescents and  
732 integration of parents on sexual and reproductive health discussions in school would help  
733 facilitate sexuality discussions. Adolescence is a crucial time for socialization and one important  
734 aspect of socialization is communication about sexual and reproductive health matters.<sup>36</sup> The  
735 earliest and critical influencers on the sexual development of children are parents which make  
736 them most suitable source of provision of sex education to their wards due to extensive  
737 involvement in their lives.<sup>24</sup> Parents have the ability to guide their children's sexual and  
738 reproductive health development, and also encourage them to practice safe sexual behaviour.<sup>13</sup>  
739 In facilitating parent-adolescent sexual-risk communications, parents must learn to interact  
740 socially with the adolescents.

741

742

### 743 **Conclusion**

744 The current study revealed that a quarter of the parents had never discussed sex education with  
745 their children, and one-third of the adolescents reported being more comfortable discussing  
746 sexual-related issues with their mother. It was shown that more than half received sexual  
747 education from school; others were from home, the internet, or social media. From the

748 adolescent perspective, adolescent perceived barriers to sexual risk communication include  
749 adolescents being scared or uncomfortable discussing sex with their parents, parents being too  
750 busy, parents being too judgmental, a lack of trust by parents, belief by parents that sexuality  
751 discussions would lead to early sexual initiation, parents having poor or inaccurate knowledge  
752 about sex and cultural or religious barriers. Parents perceived barriers to adolescent sexual risk  
753 communication as gender differences or barriers, shame initiating sexuality discussion, fear that  
754 children will want to experiment sexually, feeling that children are too young to be educated on  
755 SRH issues, inadequate knowledge of SRH topics, lack of time for discussion, level of parental  
756 education, and traditional or religious beliefs. Understanding these barriers would help in  
757 improving parent-adolescent sexuality communications in Rivers State and in Nigeria at large.

758 This study had its limitations, due to the sensitivity of the topic; some of the adolescents were  
759 shy during interview sessions. To curb some of these limitations, the adolescents were assured of  
760 the confidentiality of the information divulged. The parents that engaged in the in-depth  
761 interview gave the same responses; thus, we achieved saturation on time, hence the small sample  
762 size. Finally, this study was conducted among in-school adolescents and may not be  
763 generalizable for out-of-school adolescents. Despite these limitations, the study contributed a lot  
764 to the literature by expounding on parent-adolescent barriers to sexual risk communication in  
765 Nigeria.

766 We recommend that adolescents should also be open to having an open and honest discussion  
767 about sex with their parents so as to minimize risky sexual behaviour. Parents should be trained  
768 to start sexuality education especially at early adolescence. The government should organize  
769 training for parents to enable them overcome the barriers to discussing sexual and reproductive  
770 health issues with their children and also on how to properly communicate with their children of



771 the opposite sex. Programs to address socio-cultural norms and religious beliefs that act as  
772 stumbling blocks to communication could be useful. The Ministry of Health and Education  
773 should also organize school health programmes to coach parents and adolescents on how best to  
774 overcome the barriers to parent-adolescent sexuality communication.

775

776

## 777 **References**

- 778 1. Bourke S, Fomby P, Mollborn S, Sennott C. Race/ethnic differences in effects of family  
779 instability on adolescents' risk behaviours. *Journal of Marriage and the Family* 2014;  
780 72:234–253. pmid:20697458.
- 781 2. United Nations Population Fund . The sexual and reproductive health of young  
782 adolescents in developing countries: Reviewing the evidence, identifying research gaps,  
783 and moving the agenda. 2018.
- 784 3. United Nations Population Fund. Strategy on adolescents. United Nations Population  
785 Fund. 2013. [www.unfpa.org](http://www.unfpa.org).
- 786 4. Rambaree K, Mousavi F, Ahmadi F. Sports participation and drug use among young  
787 people in Mauritius. *Int J Adolesc Youth* [Internet]. Routledge 2017; 3843:1–10.  
788 <http://doi.org/10.1080/02673843.2017.1325756>
- 789 5. UNFPA. The AIDS epidemic for adolescents: Annual report about AIDS with  
790 adolescents. 2016.

- 791 6. Oluwatoyin E. S, Modupe OO. Risky sexual behaviour among secondary school  
792 adolescents in Ibadan North local government area, Nigeria. *IOSR Journal of Nursing*  
793 *and Health Science* 2014. doi: 10.9790/1959-03343444.
- 794 7. Zou Y, Yan H, Wu H, Chen R, Huang D, Li S. Female undergraduate fine Arts students:  
795 A high-risk population for multiple sexual partners, unwanted pregnancy and sexually  
796 transmitted infections in China. *Eur J Contracept Reproductive. Health Care.* 2013;18  
797 (2):127-36.
- 798 8. Titiloye MA, & Ajuwon AJ. Knowledge and quality of adolescents reproductive health  
799 communication between parents and their adolescent children in Ibadan, Nigeria. *Journal*  
800 *of Public Health in Africa* 2017; 8(1). <https://doi.org/10.4801/jphia.2017.688>.
- 801 9. Gilliam M L, Neustadt A, Whitaker A, Kozloski M. Familial, cultural and psychosocial  
802 influences of use of effective methods of contraception among Mexican-American  
803 adolescents and young adults. *Journal of Pediatric and Adolescent Gynecology* 2011; 24,  
804 79-84. doi:10.1016/j.jpag.2010.10.002.
- 805 10. Guilamo-Ramos V, Bouris A, Lee J, McCarthy K, Michael S L, Pitt-Barnes S, Dittus P.  
806 Paternal influence on adolescent sexual risk behaviours: A structured literature review.  
807 *Pediatrics* 2012; 130, 1313-1325.
- 808 11. Bastein S, Kajulu LJ, Muhwezi WW. *A review of studies of parent-child communication*  
809 *about sexuality & HIV/AIDS in Sub-Saharan Africa.* *BMC Reproductive Health* 2011;  
810 8(25):1-17.
- 811 12. Fanta M, Lemma S, Sagaro GG, & Meskele M. Factors associated with adolescent–  
812 parent communication of reproductive health issues among high school and preparatory  
813 students in Boditi town, Southern Ethiopia: a cross-sectional study 2015.

- 814 13. Yadeta D, Bechane HK, & Tura AK. Factors affecting parent-adolescent discussion on  
815 reproductive health issues in Harar, Eastern Ethiopia: A cross-sectional Study. *Journal of*  
816 *Environmental & Public Health. Volume. 2014.*
- 817 14. Advocates for Youth. Parent-child communication fact sheet: Promoting Sexuality  
818 Healthy Youth. Washington DC. 2010.
- 819 15. Shiferaw K, Getahun F, Asres G. Assessment of adolescent's communication on sexual  
820 & reproductive health matters with parents and associates factors among secondary and  
821 preparatory schools' students in Debremarkos town, North Ethiopia. *Reproductive*  
822 *Health. 2014; 11:2.*
- 823 16. Esuabana S. Perception of parents towards sex education on primary school pupils in  
824 Calabar education zone of Cross River state, Nigeria. *International Journal of Scientific*  
825 *Research in Education. 2017; 10(2), 176- 190.*
- 826 17. Ayalew M, Mengistie B, Semahegn A. Adolescent- parent communication on sexual &  
827 reproductive health issues among high school students in Dire, Dana, Eastern Ethiopia: a  
828 cross sectional study. *Reproductive Health. 2014; 11:77. https://doi.org/10.1186/1742-*  
829 *4755-11-77.*
- 830 18. Akpama EG. Parental perception of the teaching of sex education to adolescent in  
831 secondary school in Cross River State, Nigeria. *Journal of Research & Method in*  
832 *Education. 2013; 1(3), 31-36.*
- 833 19. Nyarko K, Adentwi KI., Asumeng M, Ahulu L, D. Parental attitude towards sex  
834 education at the lower primary in Ghana. *International Journal of Elementary Education*  
835 *2014; 3(2):21-29.*

- 836 20. Ukpaka CP, & Ukpaka C. Characteristics of groundwater in Port Harcourt Local  
837 Government Area, *Chem. Int.* 2016; 2(3) 136-144.
- 838 21. United Nations International Children's Emergency Fund. Statistical tables. 2017.
- 839 22. Nundwe CS. *Barriers to communication between parents and adolescents concerning*  
840 *sexual and reproductive health issues: A case study of Kinndonimunicipality.* Muhimbili  
841 University of health and allied sciences. 2012.
- 842 23. Dessie Y, Berhane Y, Worku A. Parent-adolescent Sexual and Reproductive Health  
843 communication is very limited and associated with adolescent poor behavioural beliefs  
844 and subjective norms: Evidence for a community based cross-sectional study in Eastern  
845 Ethiopia. PLoS ONE. 2015; 10(7):e0129941. doi: 10.1371/journal.pone.0129941
- 846 24. Adofoli GM. Parents adolescent communication on sexual health and behaviour in  
847 Anfoega North Dayi. <http://ugspace.ug.edu.gh/handle/123456789/25870>. 2018.
- 848 25. Linberg Laura. Fewer U.S teens are receiving formal sex education now than in the past.  
849 Guttmacher Institute. 2016.
- 850 26. Oejbuyi BR, Fagbamigbe AF, Akinola, OO. Prevalence of and factors influencing  
851 Parent-Child communication about HIV/AIDS, and Sexual and Reproductive Health  
852 issues in Nigeria. 2019. <https://doi.org/10.1177/2158244019833880>.
- 853 27. Mbachu CO, Agu IC, Eze I, Agu C, Ezenwaka U, Ezumah N, Onwujekwe O. Exploring  
854 issues in caregivers and parent communication of sexual and reproductive health matters  
855 with adolscents in Ebonyi sate, Nigeria. 2020; 20:77 [https://doi.org/10.1186/s12889-019-](https://doi.org/10.1186/s12889-019-8058-5)  
856 8058-5.

- 857 28. Kamangu AA, John MR, Nyakoki SJ. Barriers to parent-child communication on sexual  
858 and reproductive health issues in East Africa: A review of qualitative research in four  
859 countries. *Journal of African Studies and Development*. 2017; 9(4), 45-50.
- 860 29. Motsomi K, Makanjee C, Basera T, Nyasulu P. Factors affecting effective  
861 communication about sexual and reproductive health issues between parents and  
862 adolescents in zandspruit informal settlement, Johannesburg, South Africa. *The Pan*  
863 *African Medical Journal* 2016; 25.
- 864 30. Krugu JK, Mevissen FEF, Prinsen A, Ruiter RAC, Muleya M. Who's that girl? A  
865 qualitative analysis of adolescent girls' views on factors associated with teenage  
866 pregnancies in Bolgatanga, Ghana. *Reprod Health*. 2016. [https://doi.org/10.1186/s12978-](https://doi.org/10.1186/s12978-016-0161-9)  
867 [016-0161-9](https://doi.org/10.1186/s12978-016-0161-9).
- 868 31. Aliyu TK, Aransiola, JO. Parent-Adolescent Communication About Reproductive Health  
869 Issues in Nigeria. *SAGE Open*, 2023;13 (2), 21582440231166607.
- 870 32. Pariera K. Barriers and prompts to parent-child sexual communication. *Journal of Family*  
871 *Communication* 2016. DOI: 10.1080/15267431.2016.1181068.
- 872 33. Klu D, Agordoh P, Acquah E, Doegah P, Ofosu A, Ansah E.K, Gyapong M.  
873 Determinants of communication between adolescents and their parents in the Adaklu  
874 district of the Volta region, Ghana: a multinomial logistic regression analysis.  
875 *Reproductive health* 2022; 19(1), 101. <https://doi.org/10.1186/s12978-022-01402-0>.
- 876 34. Rimamnunra GN, Bitto TT, Areo OO, Ukpabi DE, Bako IA et al. Factors that Influence  
877 Parent-Adolescent Communication on Adolescent Reproductive Health in Benue State  
878 Nigeria. *nega UM J Biomed Res Clin Pract*: 2021;4(4):1-9. DOI:  
879 [10.5281/zenodo.6330083](https://doi.org/10.5281/zenodo.6330083)

- 880 35. Malaclane M, Beckmeyer JJ. A review of parent-based barriers to parent-adolescent  
881 communication about sex and sexuality: Implications for sex and family educators.  
882 *American Journal of Sexuality Education* 2016; 11(1):27-40. DOI:  
883 10.1080/15546128.2016.1146187.
- 884 36. Mba CJ. Sexual behaviours and the risks of HIV/AIDS and other STDs among young  
885 people in sub-Saharan Africa: an under-researched area? *BMC Int. Health Hum.Rights*  
886 2013; 13:11.
- 887
- 888
- 889
